# Supplementary material for: Enhancing the photovoltaic properties of low bandgap terpolymers based on benzodithiophene and phenanthrophenazine by introducing different second acceptor units
Source: Royal Society of Chemistry journal article supplement (doi:10.1039/c5py01985k), 2016-01-01
Supplement: c5py01985k1.pdf [file c5py01985k1.pdf]

Supporting information

**Enhancing photovoltaic properties of low bandgap terpolymers  
based on benzodithiophene and phenanthrophenazine by  
introducing different second acceptor units**

Qunping Fan <sup>a</sup>, Xiaopeng Xu <sup>b</sup>, Yu Liu <sup>a,\*</sup>, Wenyan Su <sup>a</sup>, Xunming He <sup>a</sup>,

Youming Zhang <sup>a</sup>, Hua Tan <sup>a</sup>, Yafei Wang <sup>a</sup>, Qiang Peng <sup>b,\*</sup>, Weiguo Zhu <sup>a,\*</sup>

<sup>a</sup> *College of Chemistry, Xiangtan University, Key Lab of Environment-Friendly  
Chemistry and Application in Ministry of Education, Xiangtan 411105, China*

<sup>b</sup> *Key Laboratory of Green Chemistry and Technology of Ministry of Education,  
College of Chemistry, Sichuan University, Chengdu 610064, China*

Corresponding author: Prof. Yu Liu; Qiang Peng; Weiguo Zhu

Tel: +86-731-58293377

Fax: +86-731-58292251

E-mail addresses: [liuyu03b@126.com](mailto:liuyu03b@126.com); [qiangpengjohnny@yahoo.com](mailto:qiangpengjohnny@yahoo.com);

[zhuwg18@126.com](mailto:zhuwg18@126.com)

## 1. Photovoltaic properties of terpolymer based PSCs at different conditions

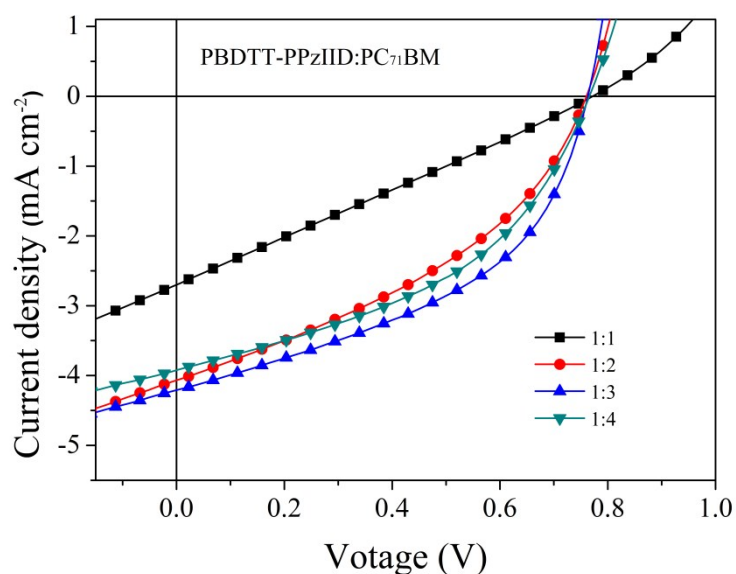

**Fig. S1a**  $J$ - $V$  curves of the PBDTT-PPzIID/ $PC_{71}$ BM-based PSCs at different blend ratios ( $w/w$ ) under illumination of AM 1.5G, 100  $mW/cm^2$ .

**Table S1a** Photovoltaic properties of the PBDTT-PPzIID/ $PC_{71}$ BM-based PSCs at different blend ratios ( $w/w$ ) under illumination of AM 1.5G, 100  $mW/cm^2$ .

| D/A Ratio | $J_{sc}/ mA\ cm^{-2}$ | $V_{oc}/ V$ | $FF/ \%$ | $PCE_{max}/ \%$ |
|-----------|-----------------------|-------------|----------|-----------------|
| 1/1       | 2.67                  | 0.76        | 26.3     | 0.54            |
| 1/2       | 4.05                  | 0.75        | 39.4     | 1.19            |
| 1/3       | 4.19                  | 0.76        | 45.5     | 1.45            |
| 1/4       | 3.91                  | 0.76        | 43.9     | 1.31            |

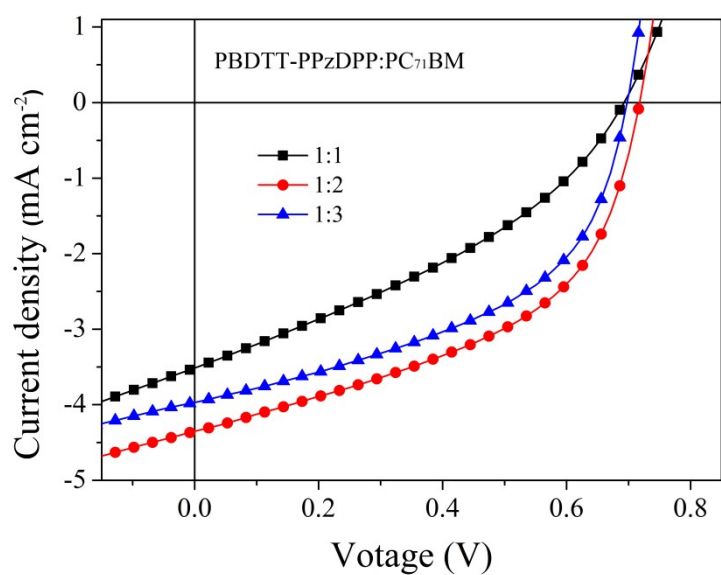

**Fig. S1b**  $J$ - $V$  curves of the PBDTT-PPzDPP/PC<sub>71</sub>BM-based PSCs at different blend ratios ( $w/w$ ) under illumination of AM 1.5G, 100 mW/cm<sup>2</sup>.

**Table S1b** Photovoltaic properties of the PBDTT-PPzDPP/PC<sub>71</sub>BM-based PSCs at different blend ratios ( $w/w$ ) under illumination of AM 1.5G, 100 mW/cm<sup>2</sup>.

| D/A Ratio | $J_{sc}/ \text{mA cm}^{-2}$ | $V_{oc}/ \text{V}$ | $FF/ \%$ | $\text{PCE}_{\text{max}}/ \%$ |
|-----------|-----------------------------|--------------------|----------|-------------------------------|
| 1/1       | 3.49                        | 0.69               | 35.8     | 0.86                          |
| 1/2       | 4.34                        | 0.72               | 48.7     | 1.51                          |
| 1/3       | 3.96                        | 0.69               | 49.3     | 1.34                          |

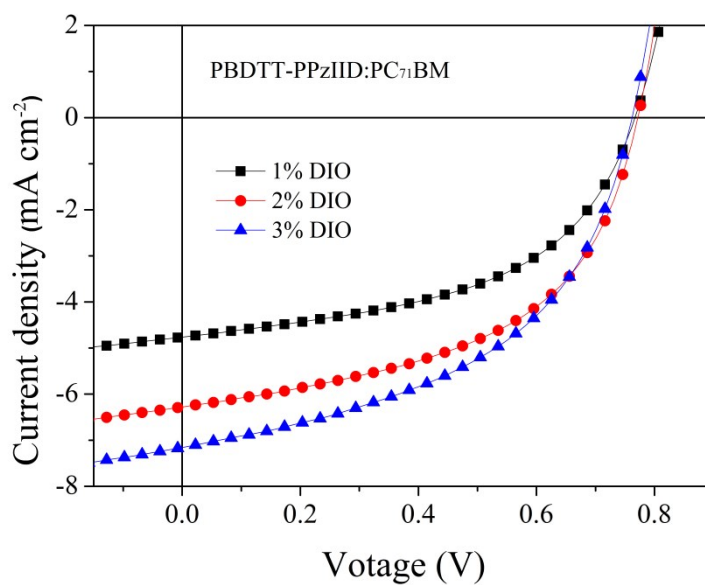

**Fig. S2a**  $J$ - $V$  curves of the PBDTT-PPzIID/PC<sub>71</sub>BM-based PSCs at different DIO additive concentrations under illumination of AM 1.5G, 100 mW/cm<sup>2</sup>.

**Table S2a** Photovoltaic properties of the PBDTT-PPzIID/PC<sub>71</sub>BM-based PSCs at different DIO additive concentrations under illumination of AM 1.5G, 100 mW/cm<sup>2</sup>.

| DIO additive concentrations | $J_{sc}/ \text{mA cm}^{-2}$ | $V_{oc}/ \text{V}$ | $FF/ \%$ | $\text{PCE}_{\text{max}}/ \%$ |
|-----------------------------|-----------------------------|--------------------|----------|-------------------------------|
| 1%                          | 4.75                        | 0.76               | 51.1     | 1.85                          |
| 2%                          | 6.27                        | 0.76               | 52.2     | 2.49                          |
| 3%                          | 7.14                        | 0.76               | 48.9     | 2.66                          |

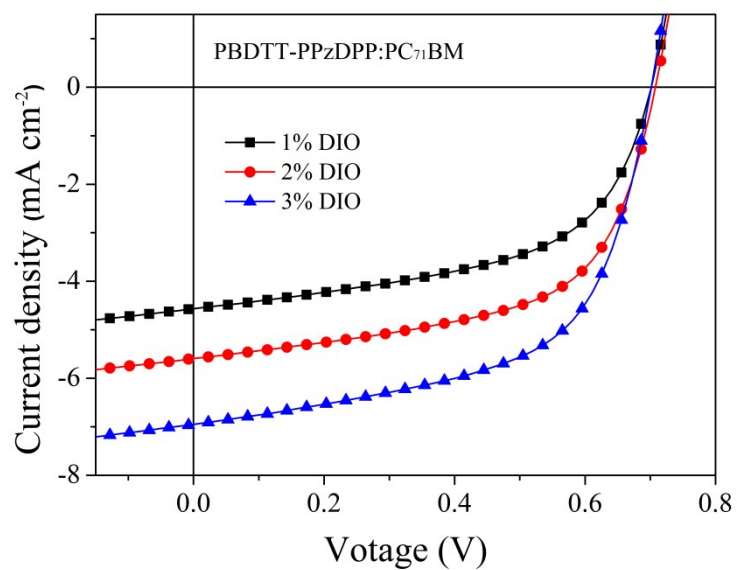

**Fig. S2b**  $J$ - $V$  curves of the PBDTT-PPzDPP/PC<sub>71</sub>BM-based PSCs at different DIO additive concentrations under illumination of AM 1.5G, 100 mW/cm<sup>2</sup>.

**Table S2b** Photovoltaic properties of the PBDTT-PPzDPP/PC<sub>71</sub>BM-based PSCs at different DIO additive concentrations under illumination of AM 1.5G, 100 mW/cm<sup>2</sup>.

| DIO additive concentrations | $J_{sc}/ \text{mA cm}^{-2}$ | $V_{oc}/ \text{V}$ | $FF/ \%$ | $\text{PCE}_{\text{max}}/ \%$ |
|-----------------------------|-----------------------------|--------------------|----------|-------------------------------|
| 1%                          | 4.55                        | 0.70               | 51.1     | 1.76                          |
| 2%                          | 5.58                        | 0.70               | 59.4     | 2.32                          |
| 3%                          | 6.93                        | 0.70               | 58.7     | 2.85                          |

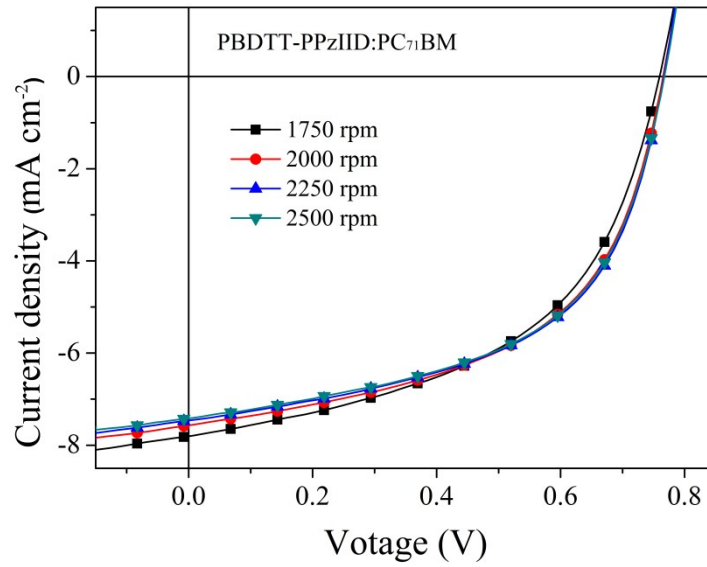

**Fig. S3a**  $J$ - $V$  curves of the PBDTT-PPzIID/PC<sub>71</sub>BM-based PSCs at different spin-coating rates under illumination of AM 1.5G, 100 mW/cm<sup>2</sup>.

**Table S3a** Photovoltaic properties of the PBDTT-PPzIID/PC<sub>71</sub>BM-based PSCs at different spin-coating rates under illumination of AM 1.5G, 100 mW/cm<sup>2</sup>.

| spin-coating rates/ rpm | film thickness/ nm | $J_{sc}/ \text{mA cm}^{-2}$ | $V_{oc}/ \text{V}$ | $FF/ \%$ | $\text{PCE}_{\text{max}}/ \%$ |
|-------------------------|--------------------|-----------------------------|--------------------|----------|-------------------------------|
| 1750                    | 103                | 7.79                        | 0.75               | 51.8     | 3.01                          |
| 2000                    | 96                 | 7.55                        | 0.76               | 53.7     | 3.09                          |
| 2250                    | 90                 | 7.45                        | 0.76               | 55.0     | 3.12                          |
| 2500                    | 85                 | 7.41                        | 0.76               | 54.9     | 3.10                          |

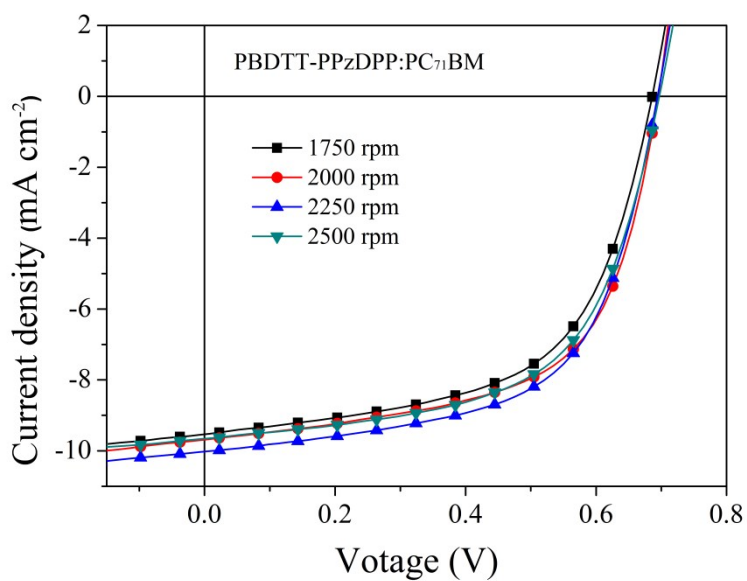

**Fig. S3b**  $J$ - $V$  curves of the PBDTT-PPzDPP/PC<sub>71</sub>BM-based PSCs at different spin-coating rates under illumination of AM 1.5G, 100 mW/cm<sup>2</sup>.

**Table S3b** Photovoltaic properties of the PBDTT-PPzDPP/PC<sub>71</sub>BM-based PSCs at different spin-coating rates under illumination of AM 1.5G, 100 mW/cm<sup>2</sup>.

| spin-coating rates/ rpm | film thickness/ nm | $J_{sc}/ \text{mA cm}^{-2}$ | $V_{oc}/ \text{V}$ | $FF/ \%$ | $\text{PCE}_{\text{max}}/ \%$ |
|-------------------------|--------------------|-----------------------------|--------------------|----------|-------------------------------|
| 1750                    | 107                | 9.52                        | 0.69               | 58.5     | 3.82                          |
| 2000                    | 98                 | 9.67                        | 0.69               | 61.3     | 4.06                          |
| 2250                    | 93                 | 10.0                        | 0.69               | 60.9     | 4.18                          |
| 2500                    | 89                 | 9.64                        | 0.69               | 60.2     | 3.98                          |

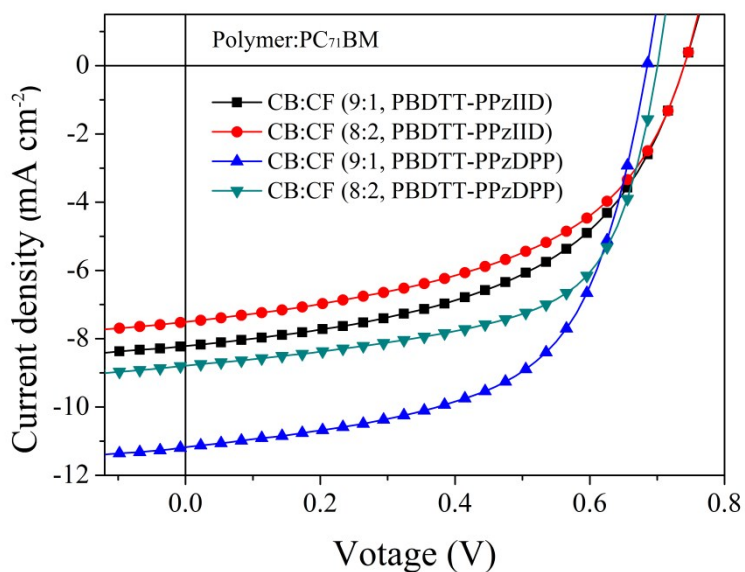

**Fig. S4**  $J$ - $V$  curves of the terpolymers/ $PC_{71}BM$ -based PSCs at different  $CB/CHCl_3$  ratios under illumination of AM 1.5G,  $100\text{ mW/cm}^2$ .

**Table S4** Photovoltaic properties of the terpolymers/ $PC_{71}BM$ -based PSCs at different  $CB/CHCl_3$  ratios under illumination of AM 1.5G,  $100\text{ mW/cm}^2$ .

| Terpolymers               | $J_{sc}/\text{mA cm}^{-2}$ | $V_{oc}/\text{V}$ | $FF/\%$ | $PCE_{max}/\%$ |
|---------------------------|----------------------------|-------------------|---------|----------------|
| PBDTT-PPzIID <sup>a</sup> | 8.20                       | 0.73              | 51.3    | 3.08           |
| PBDTT-PPzIID <sup>b</sup> | 7.49                       | 0.73              | 50.6    | 2.77           |
| PBDTT-PPzDPP <sup>a</sup> | 11.2                       | 0.67              | 60.2    | 4.51           |
| PBDTT-PPzDPP <sup>b</sup> | 8.77                       | 0.69              | 62.6    | 3.79           |

<sup>a</sup>  $CB/CHCl_3$  ratio is 9/1; <sup>b</sup>  $CB/CHCl_3$  ratio is 8/2.



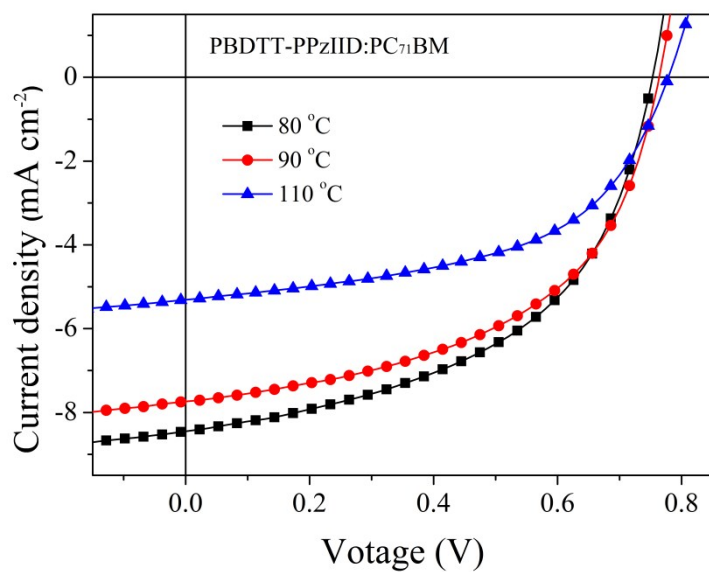

**Fig. S5a**  $J$ - $V$  curves of the PBDTT-PPzIID/PC<sub>71</sub>BM-based PSCs at different temperature under illumination of AM 1.5G, 100 mW/cm<sup>2</sup>.

**Table S5a** Photovoltaic properties of the PBDTT-PPzIID/PC<sub>71</sub>BM-based PSCs at different temperature under illumination of AM 1.5G, 100 mW/cm<sup>2</sup>.

| Temperature/ °C | $J_{sc}/ \text{mA cm}^{-2}$ | $V_{oc}/ \text{V}$ | $FF/ \%$ | $\text{PCE}_{max}/ \%$ |
|-----------------|-----------------------------|--------------------|----------|------------------------|
| 80              | 8.43                        | 0.75               | 51.5     | 3.24                   |
| 90              | 7.73                        | 0.76               | 52.0     | 3.06                   |
| 100             | 5.30                        | 0.78               | 53.3     | 2.19                   |

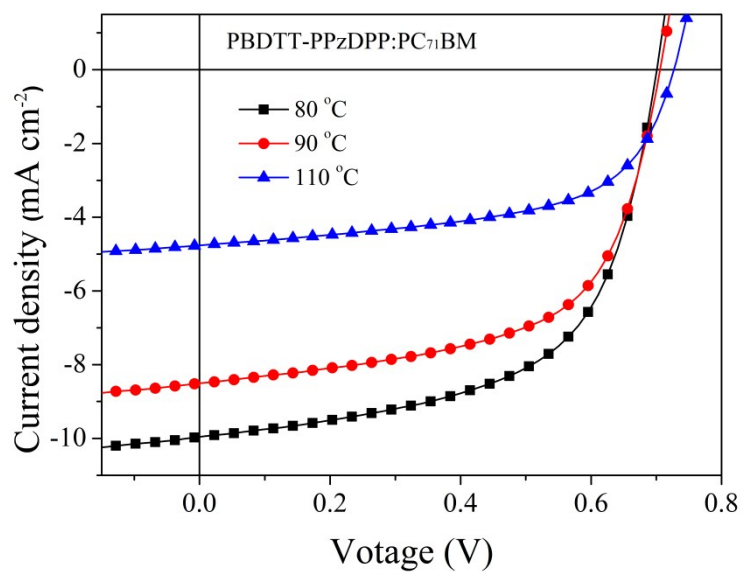

**Fig. S5b**  $J$ - $V$  curves of the PBDTT-PPzDPP/PC<sub>71</sub>BM-based PSCs at different temperature under illumination of AM 1.5G, 100 mW/cm<sup>2</sup>.

**Table S5b** Photovoltaic properties of the PBDTT-PPzDPP/PC<sub>71</sub>BM-based PSCs at different temperature under illumination of AM 1.5G, 100 mW/cm<sup>2</sup>.

| Temperature/ °C | $J_{sc}$ / mA cm <sup>-2</sup> | $V_{oc}$ / V | $FF$ / % | $PCE_{max}$ / % |
|-----------------|--------------------------------|--------------|----------|-----------------|
| 80              | 9.94                           | 0.69         | 60.5     | 4.12            |
| 90              | 8.49                           | 0.70         | 60.6     | 3.61            |
| 100             | 4.75                           | 0.72         | 58.8     | 2.00            |
